# Supplementary material for: Insight into non-covalent interactions in a [Cu(N3)4]2− bridged hetero-pentanuclear copper(ii)/sodium complex with special emphasis on the strong CH⋯π[Cu(N3)4] interactions
Source: Royal Society of Chemistry journal article supplement (doi:10.1039/d2nj00614f), 2022-01-01
Supplement: d2nj00614f1.pdf [file d2nj00614f1.pdf]

## Supplementary Information

Insight into non-covalent interactions in a  $[\text{Cu}(\text{N}_3)_4]^{2-}$ -bridged hetero-pentanuclear copper(II)/sodium complex with special emphasis on the strong  $\text{CH}\cdots\pi[\text{Cu}(\text{N}_3)_4]$  interactions

PRASANTA KUMAR BHAUMIK, ROSA M. GOMILA, ANTONIO FRONTERA\*, SAMIA BENMANSOUR,  
CARLOS J. GÓMEZ-GARCÍA and SHOUVIK CHATTOPADHYAY\*

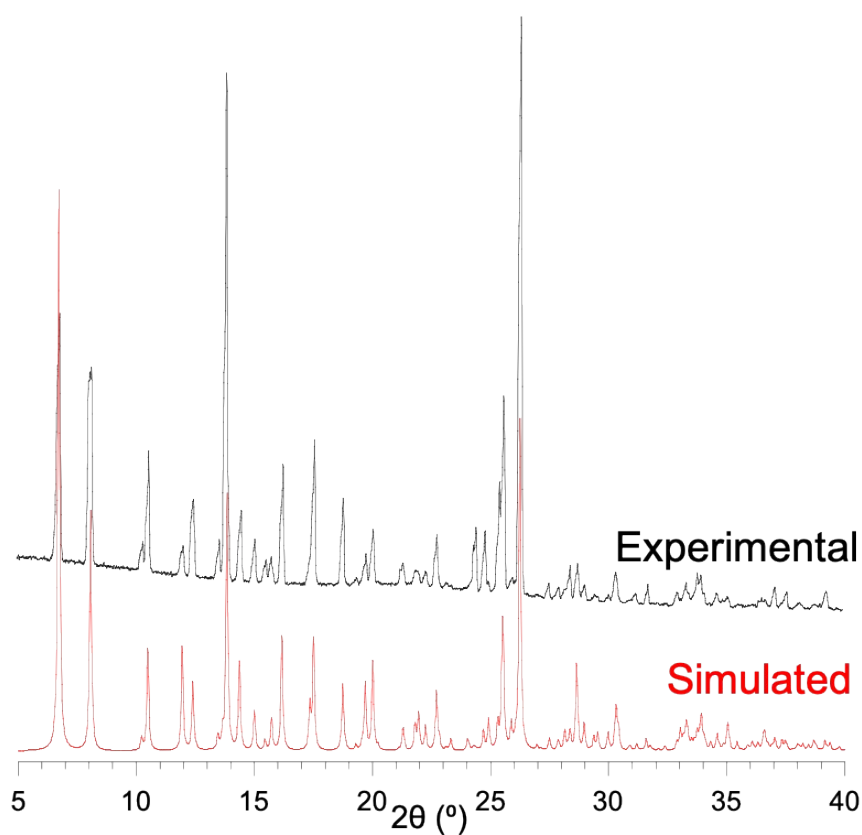

**Fig. S1** Experimental and simulated X-ray powder diffractogram of complex  $[(\text{CuLNa})_2(\mu\text{-N}_3)_2\text{Cu}(\text{N}_3)_2]$  (**1**).

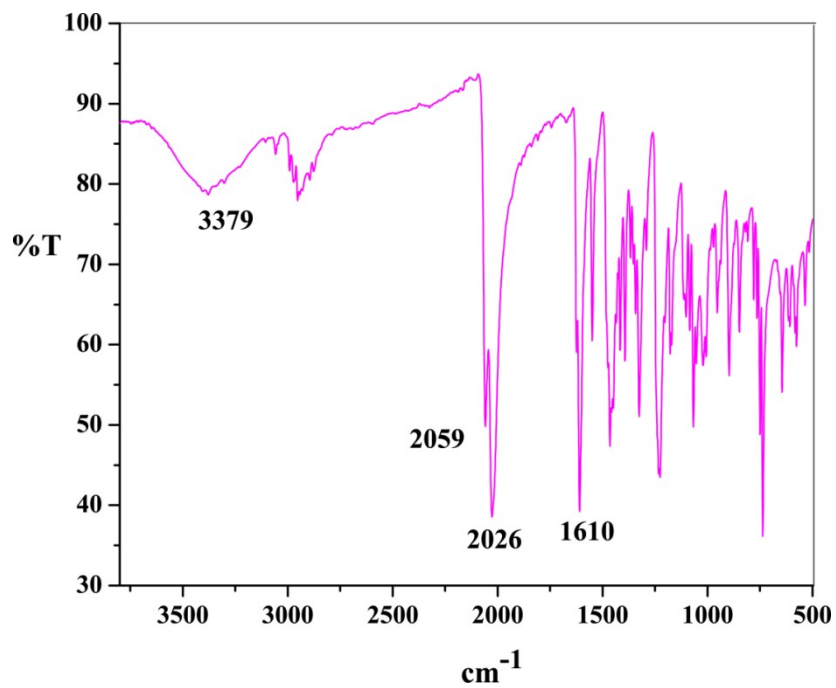

**Fig. S2** IR spectrum of the complex 1

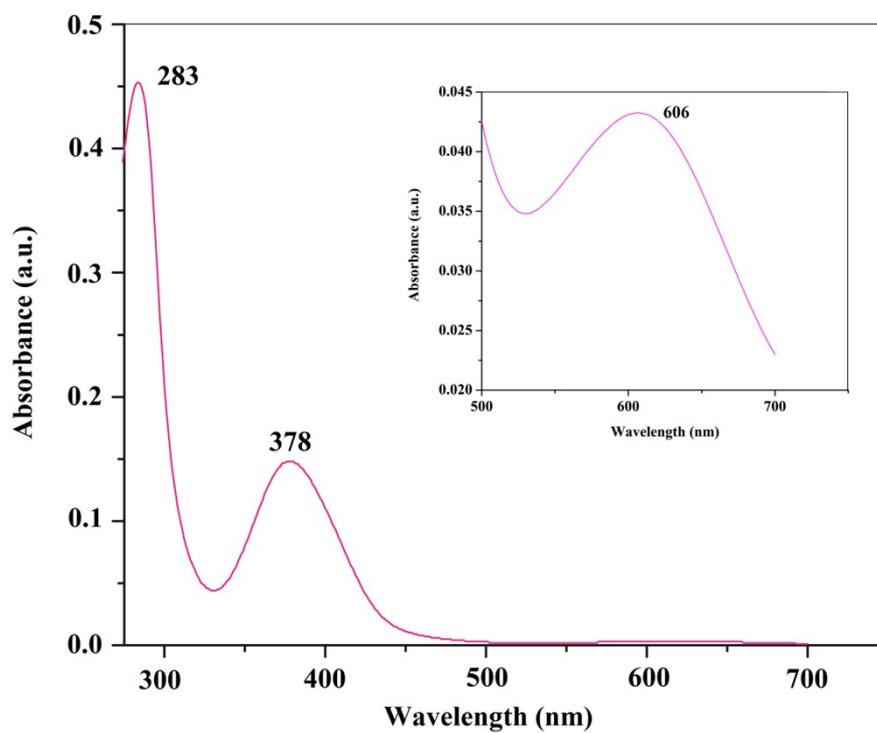

**Fig. S3** UV-Vis spectrum of the complex 1 in DMF medium (inset shows a zoom of the 500-700 nm range).

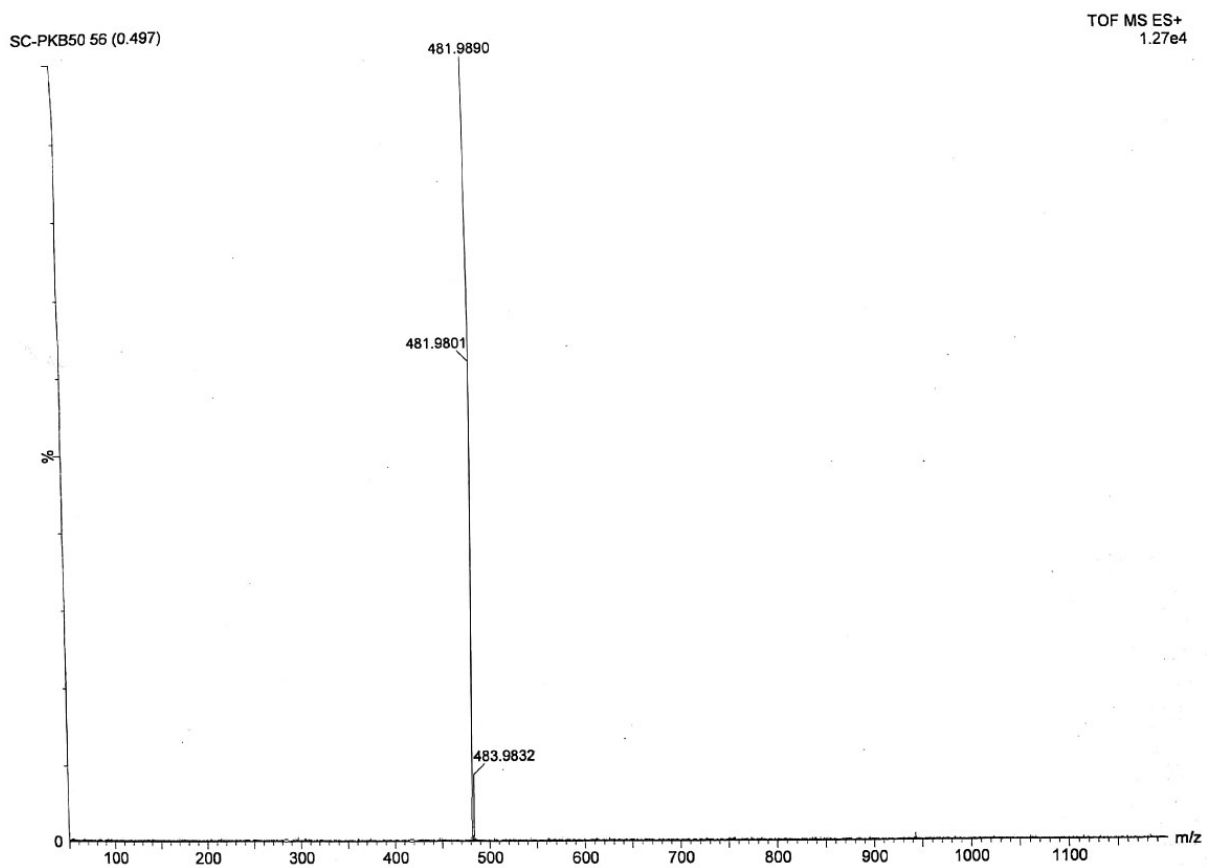

**Fig. S4** Electrospray ionization mass spectrum (ESI-MS positive) of complex **1** in acetonitrile medium.
